# Supplementary material for: Impact of Adjuvant Modalities on Survival in Patients with Advanced Stage Endometrial Carcinoma: A Retrospective Analysis from a Tertiary Medical Center
Source: PubMed Central journal article supplement (PMC6678420; doi:10.3390/ijerph16142561), 2019-07-18
Supplement: ijerph-16-02561-s001.pdf [file ijerph-16-02561-s001.pdf]

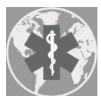

Article - supplementary material

# Impact of Adjuvant Modalities on Survival in Patients with Advanced Stage Endometrial Carcinoma: A Retrospective Analysis from a Tertiary Medical Center

Yi-Jou Tai <sup>1,2</sup>, Heng-Cheng Hsu <sup>1,2,3</sup>, Ying-Cheng Chiang <sup>1,2</sup>, Yu-Li Chen <sup>1,4</sup>, Chi-An Chen <sup>1</sup> and Wen-Fang Cheng <sup>1,2,5,\*</sup>

<sup>1</sup> Department of Obstetrics and Gynecology, College of Medicine, National Taiwan University, Taipei 100, Taiwan

<sup>2</sup> Graduate Institute of Clinical Medicine, College of Medicine, National Taiwan University, Taipei 100, Taiwan

<sup>3</sup> Department of Obstetrics and Gynecology, National Taiwan University Hospital Hsin-Chu Branch, Hsin-Chu City 300, Taiwan

<sup>4</sup> Graduate Institute of Anatomy and Cell Biology, College of Medicine, National Taiwan University, Taipei 100, Taiwan

<sup>5</sup> Graduate Institute of Oncology, College of Medicine, National Taiwan University, Taipei 100, Taiwan

\* Correspondence: wenfangcheng@yahoo.com; Tel.: +886-2-2312-3456

**Table S1.** Univariate analysis for survival of grade 1/2 and grade 3 tumors in advanced-stage patients.

| Variable                     | Grade 1/2           |          |                     |          | Grade 3             |          |                     |          |
|------------------------------|---------------------|----------|---------------------|----------|---------------------|----------|---------------------|----------|
|                              | PFS<br>HR (95% CI)  | <i>p</i> | OS<br>HR (95% CI)   | <i>p</i> | PFS<br>HR (95% CI)  | <i>p</i> | OS<br>HR (95% CI)   | <i>p</i> |
| <b>Age ≥ 60 (years)</b>      | 1.03<br>(0.49,2.17) | 0.93     | 0.75<br>(0.25,2.29) | 0.61     | 1.68<br>(0.89,3.18) | 0.11     | 1.66<br>(0.75,3.66) | 0.21     |
| <b>Menopause</b>             |                     |          |                     |          |                     |          |                     |          |
| No                           | 1                   | 0.40     | 1                   | 0.97     | 1                   | 0.14     | 1                   | 0.53     |
| Yes                          | 1.36 (0.66-2.81)    |          | 1.02<br>(0.41,2.55) |          | 1.64<br>(0.85,3.19) |          | 1.30<br>(0.57,2.95) |          |
| <b>FIGO stage</b>            |                     |          |                     |          |                     |          |                     |          |
| IIIA                         | 1                   |          | 1                   |          | 1                   |          | 1                   |          |
| IIIB                         | 3.54<br>(0.88,14.3) | 0.08     | 3.66<br>(0.32,41.6) | 0.30     | 0.72<br>(0.17,3.01) | 0.65     | 0.44<br>(0.08,2.52) | 0.36     |
| IIIC (IIIC1+IIIC2)           | 1.54<br>(0.59,4.01) | 0.38     | 4.48<br>(0.97,20.7) | 0.06     | 0.88<br>(0.33,2.38) | 0.80     | 0.52<br>(0.16,1.69) | 0.28     |
| IV (IVA+IVB)                 | 5.43<br>(1.94,15.2) | <0.01    | 9.16<br>(1.67,50.1) | <0.01    | 1.69<br>(0.61,4.66) | 0.31     | 1.25<br>(0.38,4.09) | 0.71     |
| <b>Myometrial invasion</b>   |                     |          |                     |          |                     |          |                     |          |
| <1/2                         | 1                   | 0.03     | 1                   | 0.63     | 1                   | 0.63     | 1                   | 0.78     |
| ≥1/2                         | 2.35<br>(1.09,5.05) |          | 1.26<br>(0.50,3.13) |          | 1.19<br>(0.59,2.37) |          | 1.14<br>(0.48,2.71) |          |
| <b>Presence of LVSI</b>      | 2.13<br>(0.99,4.59) | 0.05     | 1.53<br>(0.60,3.94) | 0.37     | 0.95<br>(0.37,2.43) | 0.92     | 1.17<br>(0.35,3.92) | 0.80     |
| <b>Lymph node metastases</b> | 1.71<br>(0.75,3.88) | 0.20     | 3.74<br>(1.06,13.2) | 0.04     | 0.89<br>(0.42,1.89) | 0.76     | 0.98<br>(0.36,2.65) | 0.97     |

| <b>Residual tumor size</b> |             |       |             |       |             |      |             |      |
|----------------------------|-------------|-------|-------------|-------|-------------|------|-------------|------|
| $\geq 1$ cm                | 1           | <0.01 | 1           | <0.01 | 1           | 0.37 | 1           | 0.32 |
| <1 cm                      | 0.19        |       | 0.23        |       | 0.74        |      | 0.67        |      |
|                            | (0.09,0.40) |       | (0.08,0.63) |       | (0.38,1.43) |      | (0.30,1.49) |      |
| <b>Adjuvant therapy</b>    |             |       |             |       |             |      |             |      |
| Radiation or CCRT          | 1           |       | 1           |       | 1           |      | 1           |      |
| Chemotherapy               | 2.44        | 0.02  | 2.32        | 0.09  | 1.11        | 0.76 | 0.90        | 0.81 |
|                            | (1.13,5.29) |       | (0.89,6.10) |       | (0.58,2.11) |      | (0.39,2.08) |      |
| Combined modalities        | 3.01        | 0.03  | 0.74        | 0.78  | 0.45        | 0.15 | 0.48        | 0.26 |
|                            | (1.11,8.17) |       | (0.09,5.99) |       | (0.15,1.34) |      | (0.14,1.73) |      |

PFS, progression-free survival; OS, overall survival.

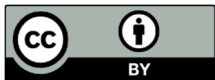

© 2019 by the authors. Submitted for possible open access publication under the terms and conditions of the Creative Commons Attribution (CC BY) license (<http://creativecommons.org/licenses/by/4.0/>).
